# Supplementary material
Source: Springer Nature journal article supplement (https://www.springermedizin.de/resource/supplementary/13550_2014_199_MOESM1_ESM.pdf/9687802)

$c_a(T)$ 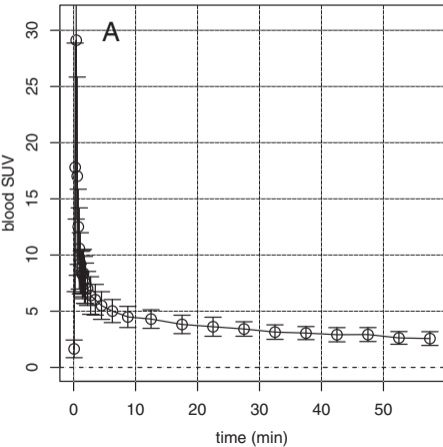 $\Theta(T)$ 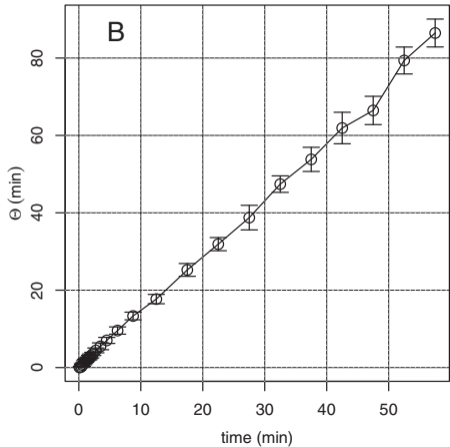

Supplement: MOESM1 [file 9687802]
